# Supplementary material for: A consensus statement on detection of hippocampal sharp wave ripples and differentiation from other fast oscillations
Source: PubMed Central journal article supplement (PMC9556539; doi:10.1038/s41467-022-33536-x), 2022-10-12
Supplement: 41467_2022_33536_MOESM1_ESM.pdf [file 41467_2022_33536_MOESM1_ESM.pdf]

## Supplementary Table 1 RODENT METHODS

| Methods                                 | 1                                                                                                   | 2                                                                           | 3                                                                                                                                                                     | 4                                                                                 | 5                                    | 6                                                              | 7                                                          | 8                                                                                                        |
|-----------------------------------------|-----------------------------------------------------------------------------------------------------|-----------------------------------------------------------------------------|-----------------------------------------------------------------------------------------------------------------------------------------------------------------------|-----------------------------------------------------------------------------------|--------------------------------------|----------------------------------------------------------------|------------------------------------------------------------|----------------------------------------------------------------------------------------------------------|
| Running Speed (Threshold)               | <5 cm/sec<br>for > 1 sec                                                                            | n/a                                                                         | n/a                                                                                                                                                                   | n/a                                                                               | <4 cm/sec                            | <5 cm/sec                                                      | n/a                                                        | n/a                                                                                                      |
| Behavioral Tasks                        | Memory demanding tasks<br><br>Non-memory demanding tasks<br><br>Optogenetic manipulation of ripples | Slow-wave sleep                                                             | Awake, head-fixed mice on a cued treadmill or non-cued floating styrofoam ball                                                                                        | Slow-wave sleep                                                                   | Freely moving conditions, NREM sleep | Linear track, Open-field exploration, goal-directed navigation | Linear track                                               | Object recognition tasks, Freely moving conditions                                                       |
| Hippocampal Electrode Type and Location | Silicon probes in CA1 pyramidal layer                                                               | Tungsten wire in prefrontal cortex, motor cortex, thalamus, and hippocampus | Silicon probes, bipolar tungsten wire, glass                                                                                                                          | Tetrodes in MPFC and CA1                                                          | CA1 tetrodes                         | CA1 tetrodes                                                   | Teflon-coated steel wire                                   | Silicon probes, glass pipettes                                                                           |
| Reference                               | Screw electrode in the skull above the cerebellum                                                   | Ground and reference electrodes were positioned above the cerebellum        | Silver/chloride wire in saline bath for acute recordings with silicon probes and glass. Chronic tungsten recordings are referenced to a superficial wire in callosum. | Stainless steel screws (reference and ground) were implanted above the cerebellum | Callosal                             | Bone screw                                                     | contralateral frontal bone                                 | Occipital screw or silver/chloride; platinum/iridium wire for glass                                      |
| Artifact rejection (EMG, Muscle)        | CSD of multilayer recordings                                                                        | Excluding motion artifacts and sleep spindles                               | Threshold ripple amplitude in cortical channels.                                                                                                                      | n/a                                                                               | n/a                                  | n/a                                                            | noisy LFP epochs removed                                   | No a priori artifact rejection                                                                           |
| High frequency Oscillation (threshold?) | Ripple: 80-300 Hz                                                                                   | 100-500 Hz                                                                  | 90-200 Hz                                                                                                                                                             | <300 Hz                                                                           | n/a                                  | 100-250 Hz<br>150-250 Hz                                       | n/a                                                        | >100 Hz                                                                                                  |
| Ripple Filter Band                      | 80-250 Hz<br><br>Difference-of-Gaussians, zero-lag, linear phase FIR                                | 80-250 Hz                                                                   | Butter bandpass filter (90-200Hz)                                                                                                                                     | 100-250 Hz, then Subtract HF power (300-500 Hz)                                   | 150-250 Hz                           | Notch (60 Hz, 120 Hz, 180 Hz)                                  | Down-sampled to 1250 Hz<br>Notch (60 Hz)<br>1/f correction | Butter filter (100-300 Hz passband for physiological; 100-600 Hz for pathological) & a non-casual filter |
| Ripple Amplitude                        | 4 SD exceeding mean and SD of                                                                       | 3-5 SD                                                                      | >5 SD                                                                                                                                                                 | > 3 SD                                                                            | >2 SD                                | 3 SD, 5 SD                                                     | n/a, SPW-R identified via                                  | >2-3SD                                                                                                   |

|                            |                                                    |                                                                         |                                                                        |                                  |                        |                                    |                                                                     |                                                                                   |
|----------------------------|----------------------------------------------------|-------------------------------------------------------------------------|------------------------------------------------------------------------|----------------------------------|------------------------|------------------------------------|---------------------------------------------------------------------|-----------------------------------------------------------------------------------|
|                            | baseline LFP during NREM sleep                     |                                                                         |                                                                        |                                  |                        |                                    | wavelet-derived feature classification                              |                                                                                   |
| Ripple Duration            | >15 ms                                             | 20-100 ms                                                               | >2 SD for 20 ms                                                        | > 1 SD for 30-110 ms             | >15 ms                 | No limit or > 2 SD for 50 – 200 ms | n/a (1 calcium imaging frame)                                       | >15 ms                                                                            |
| Sharp Wave Detection       | Yes. 8-40 Hz exceeding 2.5 SD of background signal | n/a                                                                     | n/a                                                                    | n/a                              | No                     | No                                 | Yes – pathological (IED)                                            | yes                                                                               |
| Other:                     |                                                    | Ripple and HFO detection using using RippleLab (Navarrete et al., 2016) | Offline graphical user interface (GUI) for event-by-event examination. |                                  |                        |                                    | Semi-supervised classification using wavelet derived SPW-R features | Sharp-waves at SR are detected independently and paired to ripple detection at SP |
| Representative Publication | Fernandez-Ruiz et al. Science 2019                 | Li et al., Epilepsia, 2018                                              | Varga et al. Elife 2014                                                | Todorova & Zugaro, Science, 2019 | Kay et al, Nature 2016 | Pfeiffer & Foster, Nature, 2013    | Sparks, Liao et al. Nat Comms 2020                                  | Valero et al., Neuron 2017                                                        |

n/a = not available

# PRIMATE METHODS

| Methods            | 1                                                                                                                | 2                                                                                                                                | 3                                                                                       | 4                                               | 5                     | 6                                                           | 7                                                | 8                                                       | 9                                                      |
|--------------------|------------------------------------------------------------------------------------------------------------------|----------------------------------------------------------------------------------------------------------------------------------|-----------------------------------------------------------------------------------------|-------------------------------------------------|-----------------------|-------------------------------------------------------------|--------------------------------------------------|---------------------------------------------------------|--------------------------------------------------------|
| Behavioral State   | Sleep; we only observe unambiguous SW-R during rest                                                              | Episodic-like memory retrieval, visual search, and free-moving exploration of the environment. Quiet wakefulness and NREM sleep. | Retrieval of visual episodic memory and LT autobiographical memories and semantic facts | Awake, Memory retrieval                         | NREM Sleep            | NREM Sleep                                                  | Awake Encoding and Retrieval of association task | NREM Sleep                                              | Delayed free recall (categorized and uncategorized)    |
| Electrode Type     | Chronically implanted hyperdrive; 124 independently movable microwires (Tungsten, appx 100um)                    | Chronically implanted probes: TRec Pt/W tetrodes, microwire electrodes, linear arrays (16-128ch each).                           | Macroelectrode                                                                          | Macroelectrode, Microelectrode, Single unit     | Macroelectrode        | Macroelectrode Only use channels with >100 detected events. | Macroelectrode                                   | Macroelectrode                                          | Macroelectrode                                         |
| Electrode Location | CA3, CA1, DG, Subiculum, Presubiculum, Parasubiculum, EC                                                         | CA3/DG, CA1, (pre/para)subiculum, EC, RSC                                                                                        | Within 2 mm from CA1, CA2/3, Subiculum                                                  | MTL/ MTG in Anterior Temporal Lobe              | Hippocampus           | Hippocampus                                                 | Anterior hippocampus                             | Different brain regions not affected by epilepsy        | CA1, DG, entorhinal cortex, and parahippocampal cortex |
| Electrode Montage  | Referential                                                                                                      | N/A                                                                                                                              | Referential                                                                             | Bipolar                                         | Referential           | Referential                                                 | Bipolar                                          | Bipolar                                                 | Bipolar                                                |
| Reference          | titanium chamber with distributed contact across wide swath of skull/soft tissue; post-hoc "referencing" via ICA | Nearby depth reference microwire or titanium implant as "animal ground"                                                          | Subtract nearby WM reference signal                                                     | System reference hard wired as clinical contact | Linked Mastoids       | Subtract nearby WM reference signal                         | Inverted strip electrode at site of craniotomy   | Skull screw remote from epileptic region                | System reference hard wired as clinical contact        |
| Frequency Band     | 95-180Hz                                                                                                         | 100-250 Hz                                                                                                                       | 70-180Hz                                                                                | 80-120 Hz                                       | 80-120 Hz             | 80-150 Hz                                                   | 80-120                                           | 80-250 Hz                                               | 70-178 Hz (80-120 and 125-200 Hz in Supplemental)      |
| Duration           | >25 ms                                                                                                           | >50ms                                                                                                                            | 20-200 ms                                                                               | >25 ms                                          | >38 ms <500 ms        | 20-100 ms                                                   | 20-200 ms                                        | > 4 oscillations +effective duration of filter response | 20-200 ms                                              |
| Amplitude          | >4 SD normal dist or >0.995                                                                                      | >3 SD crossing and at least 50ms >1 SD                                                                                           | Candidate events: >4 SD                                                                 | >2 SD for detection, > 3 SD                     | >2.5 SD <9 SD Of mean | >2 SD for detection, > 5 SD                                 | >2 SD for detection, > 4 SD                      | >3 SD                                                   | Candidate events: >4 SD                                |

|                                              | CDF of Gamma dist                                                                                                                                                                                                                                                                 | plus rejection of common (artifact) events                                                                                                                          | Expanded events: 2 SD                                                                                                                                  | max amplitude for inclusion                                                                                                                                   |                                                                                                                                                                                                                                               | max amplitude for inclusion            | max amplitude for inclusion                                                         |                                                                    | Expanded events: 2 SD                                                                                                                             |
|----------------------------------------------|-----------------------------------------------------------------------------------------------------------------------------------------------------------------------------------------------------------------------------------------------------------------------------------|---------------------------------------------------------------------------------------------------------------------------------------------------------------------|--------------------------------------------------------------------------------------------------------------------------------------------------------|---------------------------------------------------------------------------------------------------------------------------------------------------------------|-----------------------------------------------------------------------------------------------------------------------------------------------------------------------------------------------------------------------------------------------|----------------------------------------|-------------------------------------------------------------------------------------|--------------------------------------------------------------------|---------------------------------------------------------------------------------------------------------------------------------------------------|
| Artifact rejection (including 60 Hz, muscle) | Relative amplitude in ripple band must be 2X of adjacent bands (70-90; 185-250) to eliminate broadband noise (like chewing). Cross-channel identical phase (from hilbert transform of ripple band filtered signal) for the duration of event (each channel is minimum 1.5mm away) | As #3 rodent: out-of-layer/neocortical signals must not show ripple-band activity (logical 'NOT') including subthreshold cross correlation or zero-phase coherence. | Use the common average iEEG signal, computed across all electrodes to exclude ripple-like muscular/electrical artifacts. 60, 120, 180Hz notch filters. | 60 Hz Notch filter, remove noisy trials that exhibit excessive kurtosis or variance                                                                           | 50 Hz (and harmonics up to 200Hz) Notch filter; data marked as artifact if z-scored amplitude, z-scored amplitude gradient, or z-scored high-frequency amplitude (>250 Hz) exceeded 5 or if the conjunction of the three measures exceeded 3. | Unnecessary during NREM sleep          | 60 Hz Notch, Noisy trials removed via visual inspection                             | Unnecessary during NREM sleep                                      | 58-62 Hz notch, channels <0.1 Hz ripple rate removed. Automated detection for correlations across channels and within each channel across trials. |
| IEDs                                         | n/a                                                                                                                                                                                                                                                                               | n/a                                                                                                                                                                 | 25-60 Hz detecting transient events >4 SD                                                                                                              | >250 Hz; First derivative or high pass filtered signal (>250 Hz) with a z-score > 5 marked as artifact/IED - removed time points -100 to 100 ms around event. | >250Hz IED                                                                                                                                                                                                                                    | z-scored amplitude or derivative >5 SD | Automated IED detection via statistical distribution of iEEG voltages (Janca, 2014) | Electrodes with IEDs any time of the circadian cycle were excluded | 25-60 Hz (>250 Hz in Supplemental using Vaz algorithm)                                                                                            |
| SOZ                                          | n/a                                                                                                                                                                                                                                                                               | n/a                                                                                                                                                                 | Validation analysis: results do not change when excluding ripples that coincide with typical pathological HFOs.                                        | Not considered                                                                                                                                                | Electrodes in primary SOZ excluded                                                                                                                                                                                                            | Electrodes in primary SOZ excluded     | Electrodes in primary SOZ excluded                                                  | Excluded                                                           | Compare SOZ and non-SOZ electrodes in Supplemental                                                                                                |

|                            |                                                                                                                          |                                           |                                                                                                                                                                                                                                                                                                                                |                           |                                                                             |                            |                          |                                             |                                                       |
|----------------------------|--------------------------------------------------------------------------------------------------------------------------|-------------------------------------------|--------------------------------------------------------------------------------------------------------------------------------------------------------------------------------------------------------------------------------------------------------------------------------------------------------------------------------|---------------------------|-----------------------------------------------------------------------------|----------------------------|--------------------------|---------------------------------------------|-------------------------------------------------------|
| Other                      | Adjacent events <20 ms separation merged.                                                                                |                                           | Adjacent events <30 ms separation merged<br>Ripple-band power was computed by clipping extreme values to 4 SD. Extreme values were defined using the Least-Median-Squares (LMS) method.<br>The threshold for ripple detection (4 SD of mean), was defined based on the clipped signal to minimize ripple-rate induced biasing. |                           | >3 cycles in raw signal; discrete peak between 80 and 120 Hz in spectrogram |                            |                          | Adjacent events <20 ms separation merged.   | Same details as Norman et al (3 <sup>rd</sup> column) |
| Representative Publication | J. W. RUECKEMANN, A. DEDE, Y. BROWNING, E. A. BUFFALO, Traveling sharp-wave ripples in the monkey hippocampus. SFN 2019. | Leonard & Hoffman., Current Biology, 2016 | Norman et al., Neuron, 2021                                                                                                                                                                                                                                                                                                    | Vaz et al., Science, 2019 | Staresina et al., Nature Neuroscience, 2015                                 | Skelkin et al., PNAS, 2021 | Henin & Liu, Brain, 2020 | Frauscher et al., Annals of Neurology, 2018 | Sakon & Kahana, bioRxiv, 2021                         |
